# Supplementary material for: Near-Infrared Light-Triggered Photodynamic Therapy and Apoptosis Using Upconversion Nanoparticles With Dual Photosensitizers
Source: PubMed Central journal article supplement (PMC7179334; doi:10.3389/fbioe.2020.00275), 2020-04-16
Supplement: Data_Sheet_1.pdf [file Data_Sheet_1.pdf]

## Supplementary Material

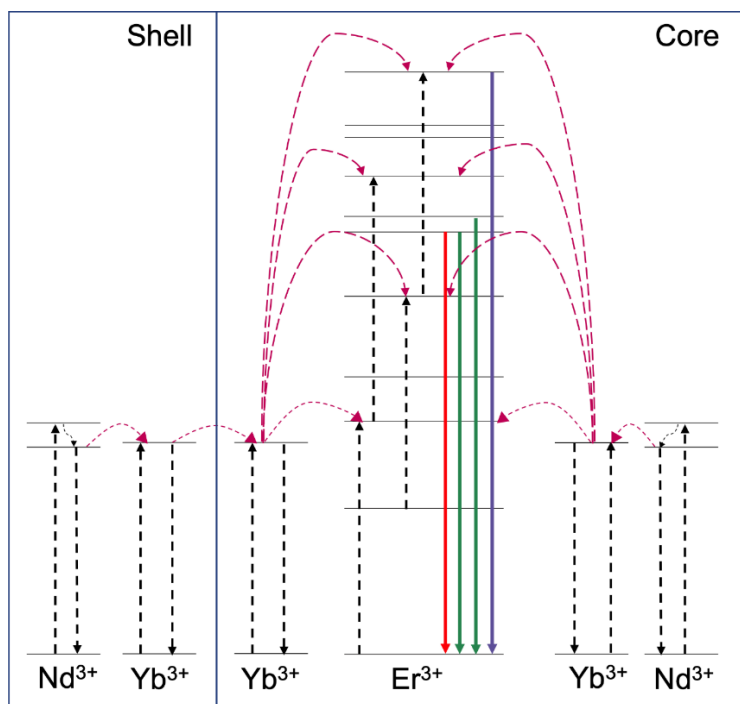

**Supplementary Figure 1.** Schematic diagram of upconversion processes of Nd-doped UCNPs with a core@shell structure.

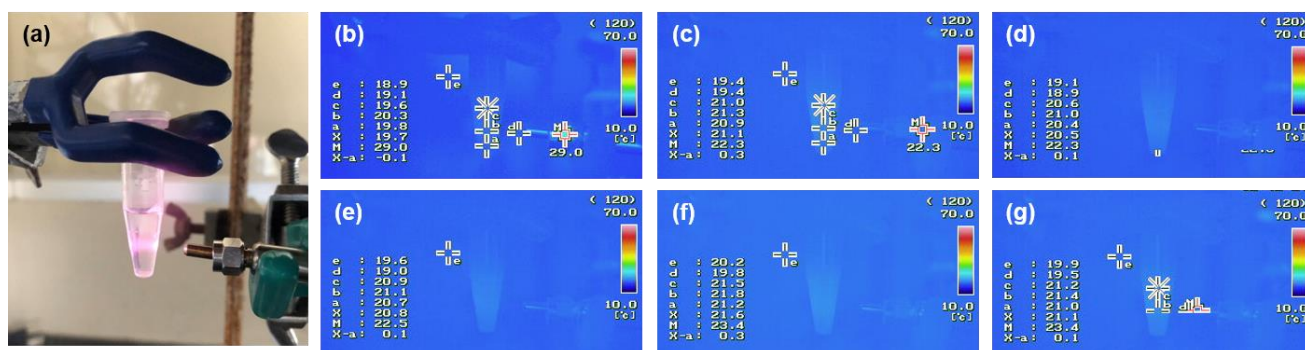

**Supplementary Figure 2.** Measurement of the heating effect by an 808 nm CW laser. (a) Photograph of UCNP sample irradiated with an 808 nm CW laser (1 W). (b-g) Thermal images of UCNP samples at different irradiation time; (b) 0 min, (c) 10 min, (d) 20 min, (e) 30 min, (f) 40 min, (g) 50 min. In the thermal images, the b position represents the position through which the laser beam passes, and a and c represent positions below and above the laser beam, respectively.

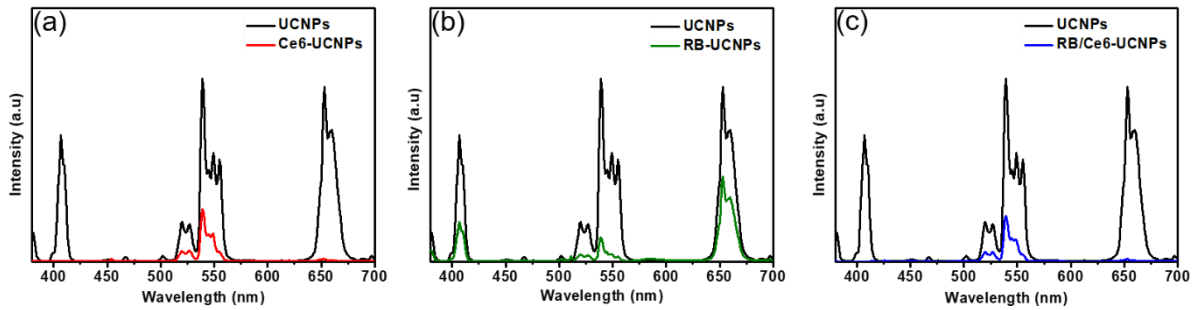

**Supplementary Figure 3.** PL spectra of UCNPs and PS-UCNPs. (a) Ce6-loaded, (b) RB-loaded, and (c) RB and Ce6-loaded UCNPs.

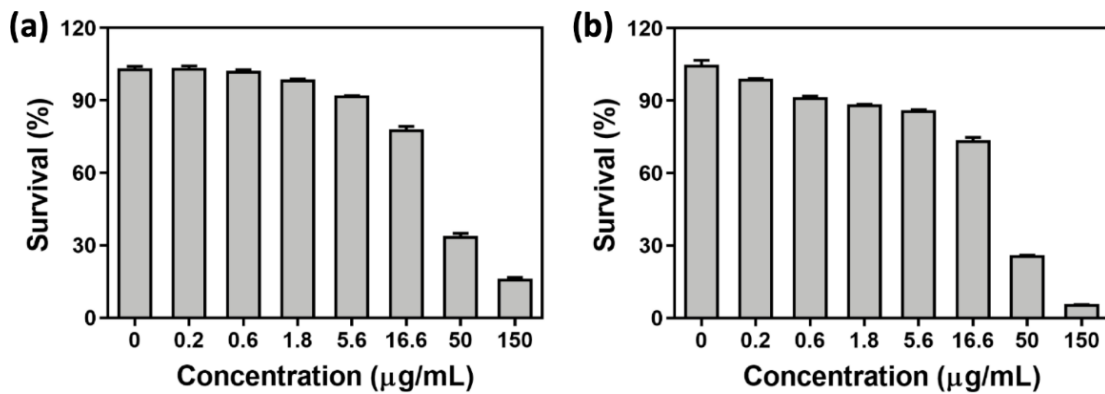

**Supplementary Figure 4.** Cytotoxicity of RB and Ce6-loaded UCNPs in B16BL6 melanoma cells (a) without and (b) with 808 nm laser irradiation.

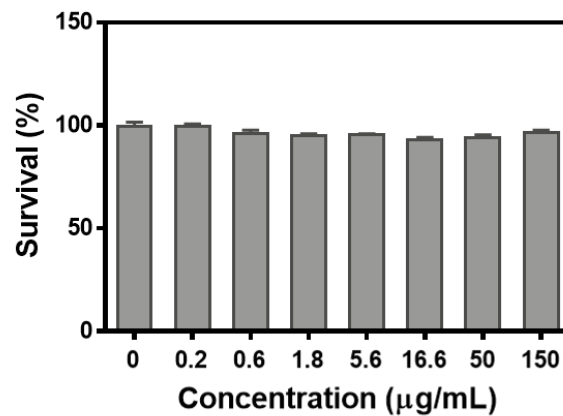

**Supplementary Figure 5.** Cytotoxicity of UCNPs in B16BL6 melanoma cells.

**Supplementary Table 1.** Elemental analysis of UCNPs.

|                  | Y (mol%) | Yb (mol%) | Er (mol%) | Nd (mol%) |
|------------------|----------|-----------|-----------|-----------|
| Core UCNPs       | 78.4     | 20.4      | 0.4       | 0.8       |
| Core/Shell UCNPs | 76.6     | 14.0      | 0.3       | 9.1       |
